# Supplementary material for: Bacterial Endophytes from Legumes Native to Arid Environments Are Promising Tools to Improve Mesorhizobium–Chickpea Symbiosis under Salinity
Source: MDPI journal article supplement (doi:10.3390/biology13020096), 2024-02-03
Supplement: s1 [file s1]

## Supplementary information

**Table S1.** Bacterial growth under control and salt stress.

| Bacterial strains     | Growth without | Growth with NaCl (%)    |                         |                         |
|-----------------------|----------------|-------------------------|-------------------------|-------------------------|
|                       | NaCl (%)       | 170 mM NaCl             | 340 mM NaCl             | 510 Mm NaCl             |
| LMS-1                 | 100            | 24.36 ±2.6 <sup>b</sup> | -                       | -                       |
| <i>P. salinisoli</i>  | 100            | 99.16 ±0.9 <sup>a</sup> | 98.95 ±1.8 <sup>a</sup> | 76.66 ±2.8 <sup>a</sup> |
| <i>P. ifriqiyense</i> | 100            | 98.71 ±2.2 <sup>a</sup> | 97.43 ±3.6 <sup>a</sup> | 74.35 ±4.4 <sup>a</sup> |
| <i>X. translucens</i> | 100            | 99.93 ±1.5 <sup>a</sup> | 95.09 ±4.4 <sup>a</sup> | 77.08 ±3.8 <sup>a</sup> |
| <i>C. respiraculi</i> | 100            | 97.61 ±2.0 <sup>a</sup> | 83.33 ±4.1 <sup>b</sup> | 22.61 ±2.0 <sup>b</sup> |

(-) No growth; Growth (%) was calculated considering growth under control conditions (without NaCl) as 100% growth for each bacterial species. Data represent the means and standard deviation of three independent replicates. Different letters in the same column indicate significant differences by Duncan test ( $p < 0.05$ ).

**Table S2.** Phenotypic characterization of bacterial strains: plant growth-promoting features and biofilm formation.

| Bacterial strains     | IAA production           | Index of phosphate solubilization (PSI) | Biofilm production      | Index of siderophores production (SPI) | ACC deaminase activity |
|-----------------------|--------------------------|-----------------------------------------|-------------------------|----------------------------------------|------------------------|
| LMS-1                 | 18.88 ±2.2 <sup>c</sup>  | nd                                      | 4.99 ±0.38 <sup>a</sup> | nd                                     | - [51]                 |
| <i>P. salinisoli</i>  | 42.5 ±2.76 <sup>a</sup>  | 2.65 ±0.15 <sup>a</sup>                 | 0.53 ±0.08 <sup>c</sup> | 1.44 ±0.05 <sup>a</sup>                | -                      |
| <i>P. ifriqiyense</i> | 31.76 ±0.75 <sup>b</sup> | -                                       | nd                      | 1.3 ±0.05 <sup>ab</sup>                | -                      |
| <i>X. translucens</i> | 39.68 ±1.78 <sup>a</sup> | -                                       | 1.27 ±0.26 <sup>b</sup> | 1.22 ± 0.11 <sup>c</sup>               | -                      |
| <i>C. respiraculi</i> | 16.3 ±1.17 <sup>c</sup>  | -                                       | nd                      | 1.46 ±0.05 <sup>a</sup>                | -                      |

(-) No activity; (nd) Not determined; Data represent the means and standard deviation of three independent replicates. Significant differences are indicated with different letters in the same column by Duncan test ( $p < 0.05$ ).

**Table S3.** Phenolic compounds composition of *Cicer arietinum* root exudates collected under control and salt stress conditions.

| Compound                               | Control (ppm/mg)           | Salinity (ppm/mg)         |
|----------------------------------------|----------------------------|---------------------------|
| Quinic acid                            | 10.331 ±0.469 <sup>a</sup> | 0.037 ±0.005 <sup>b</sup> |
| Gallic acid                            | 0.064 ±0.016 <sup>a</sup>  | -                         |
| Protocachuiic acid                     | 0.399 ±0.016 <sup>a</sup>  | 0.121 ±0.003 <sup>b</sup> |
| Cholorogenic acid                      | 0.035 ±0.002 <sup>a</sup>  | -                         |
| Caffeic acid                           | 6.906 ±0.055 <sup>a</sup>  | 0.044 ±0.003 <sup>b</sup> |
| 1,3-di-O-caffeoyquinic acid            | 33.871 ±2.716 <sup>a</sup> | -                         |
| Syringic acid                          | 3.983 ±0.166 <sup>a</sup>  | 0.729 ±0.026 <sup>b</sup> |
| Epicatechin                            | 1.753 ±0.189 <sup>a</sup>  | 0.016 ±0.004 <sup>b</sup> |
| Rutin                                  | 0.177 ±0.007 <sup>a</sup>  | -                         |
| Hyperoside (quercetin-3-o-galactoside) | 0.527 ±0.008 <sup>a</sup>  | -                         |
| Quercetrin (quercetin-3-o-rhamonoside) | 0.872 ±0.008 <sup>a</sup>  | 0.050 ±0.005 <sup>b</sup> |
| Apegenin-7-o-glucoside                 | 0.301 ±0.011 <sup>a</sup>  | 0.008 ±0.001 <sup>b</sup> |
| Salviolinic acid                       | 0.586 ±0.014 <sup>a</sup>  | -                         |

(-) Absence of the compound; Data represent the means and the standard deviation of three independent replicates under each condition; Different letters indicate statistical significance in the rows by T-test ( $p < 0.05$ ).

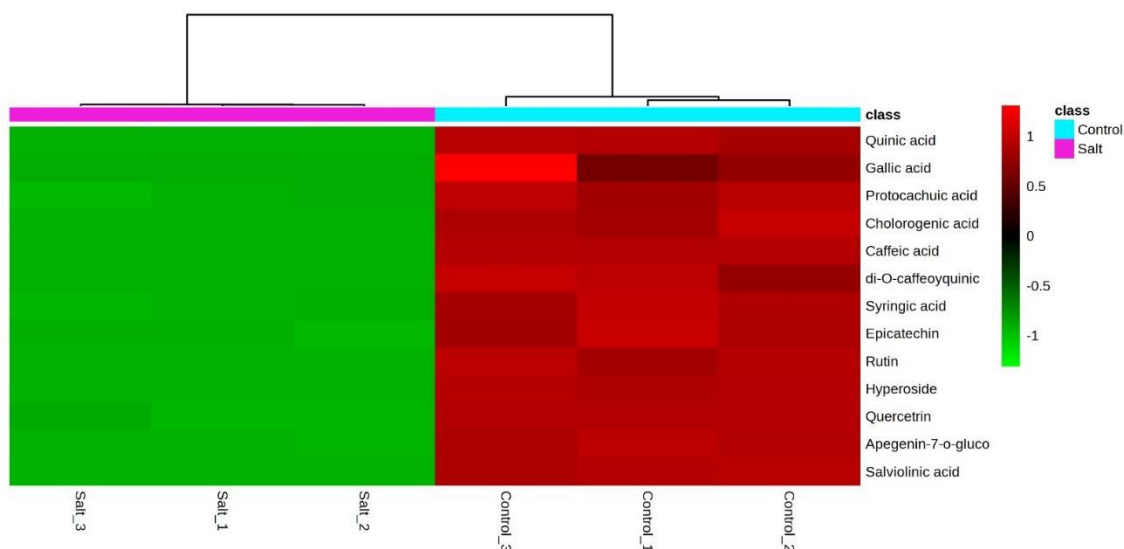

**Figure S1.** Heat map representing abundance of the phenolic compounds in the chickpea root exudates exposed to normal and salt stress conditions. Results from three independent biological replicates for each treatment are shown. Control\_ denotes for root exudates collected under normal conditions and Salt\_ denotes for root exudates collected under salt stress. 1, 2 and 3 represent the biological replicate number within each condition/treatment. The color scale ranges from: light green color corresponding to the absence or minimal abundance of the phenolic compound to red color corresponding to maximum abundance of phenolic compound.

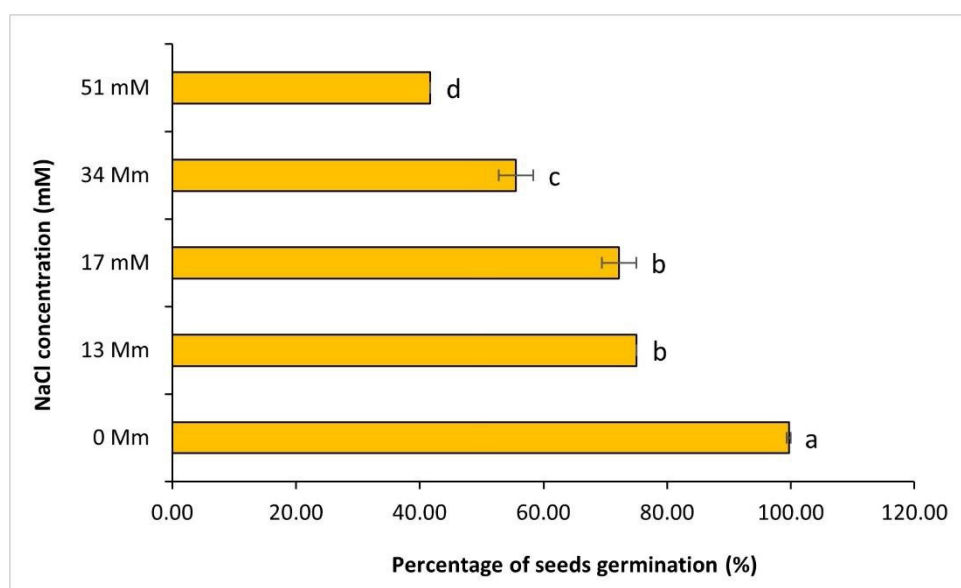

**Figure S2.** Effect of salt stress on seeds germination of chickpea. Data represent means and standard error of three independent replicates of 20 seeds per replicate. Different letters indicate statistical significance by Duncan test ( $p < 0.05$ ).

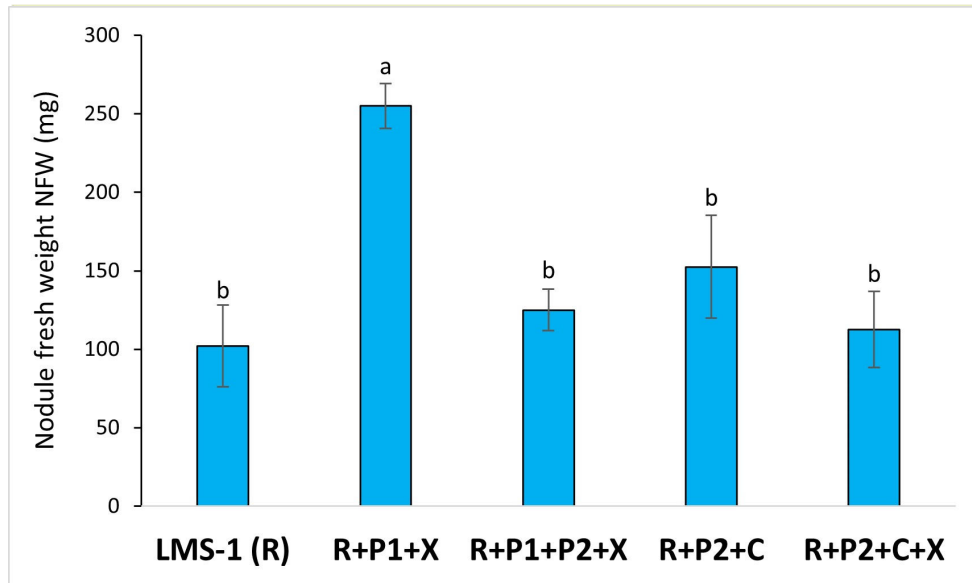

**Figure S3.** Effect of co-inoculation with non-rhizobial endophytes from arid environment on *Mesorhizobium* nodule fresh weight (NDW) under salt stress. LMS-1 (R): inoculated plants with LMS-1 alone; R+P1+X: inoculated plants with LMS-1+*P. salinisoli* + *X. translucens*; R+P1+P2+X: inoculated plants with LMS-1 + *P. salinisoli* + *P. ifriqiyense* + *X. translucens*; R+P2+C: inoculated plants with LMS-1 + *P. ifriqiyense* + *C. respiraculi*; R+P2+C+X: inoculated plants with LMS-1 + *P. ifriqiyense* + *C. respiraculi* + *X. translucens*. Error bars represent the standard error. Different letters indicate statistical significance by Duncan test ( $p < 0.05$ ).
